# Supplementary material for: Sex-Specific Differences in Severity of Depressive Symptoms, Heart Rate Variability, and Neurocognitive Profiles of Depressed Young Adults: Exploring Characteristics for Mild Depression
Source: PubMed Central journal article supplement (PMC7092630; doi:10.3389/fpsyt.2020.00217), 2020-03-17
Supplement: Image_1.pdf [file Image_1.pdf]

# Supplementary Material

## Supplementary Figure

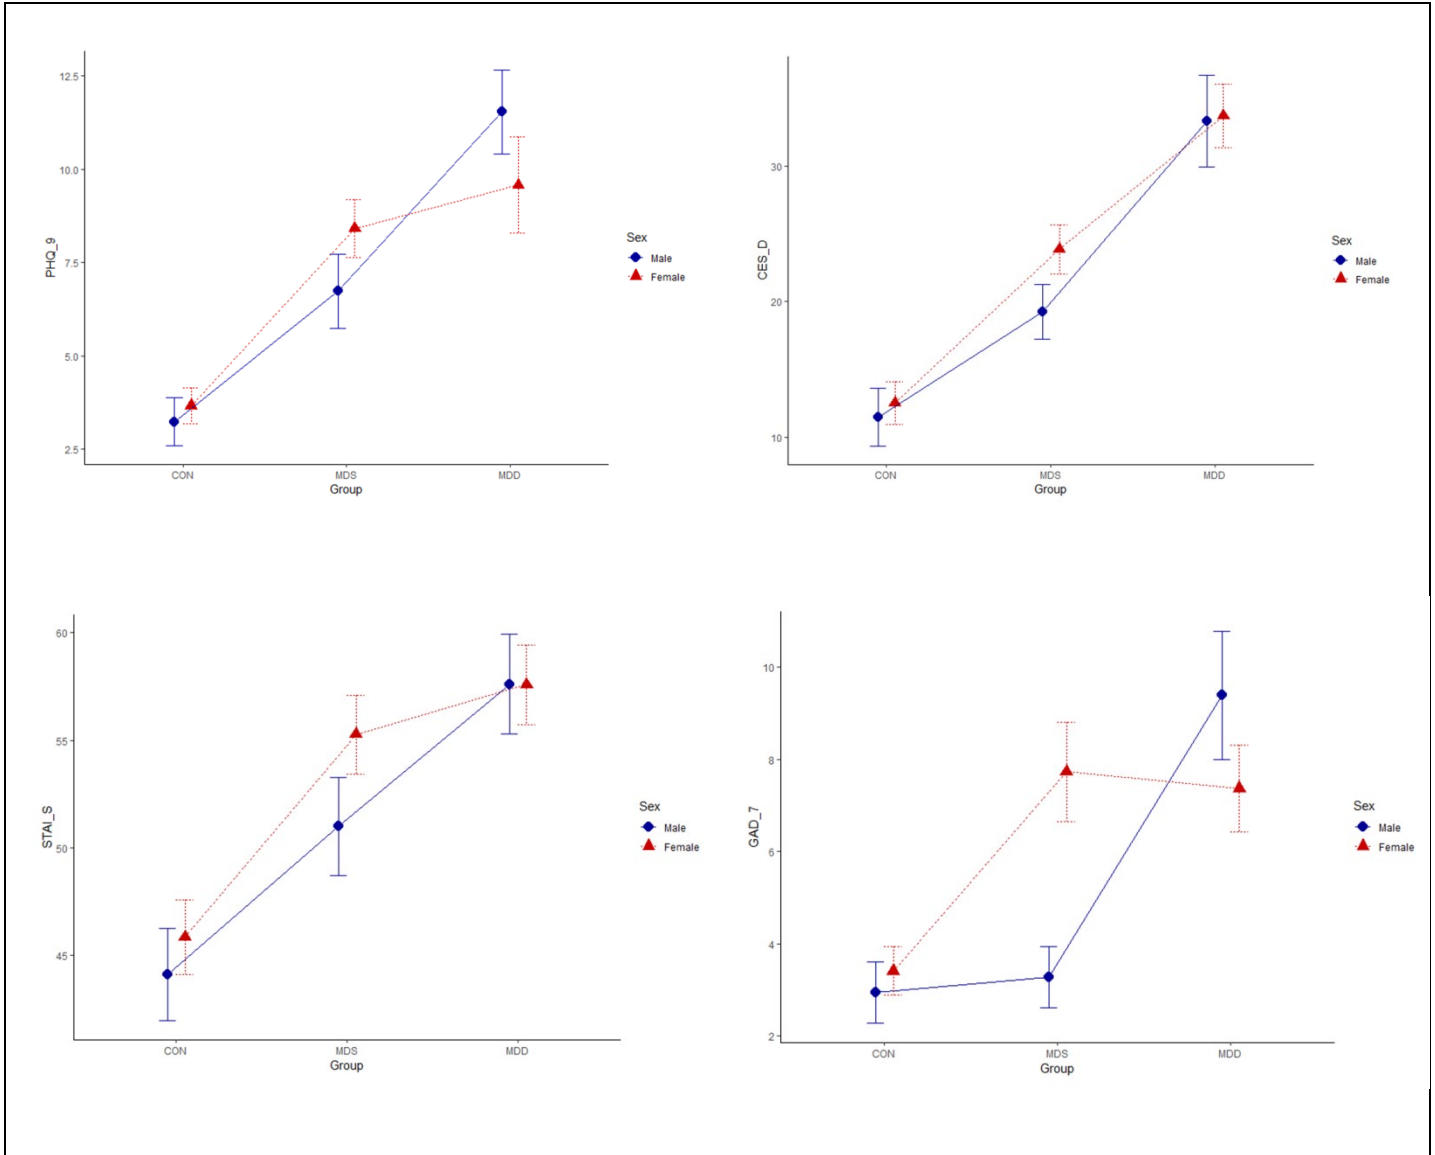

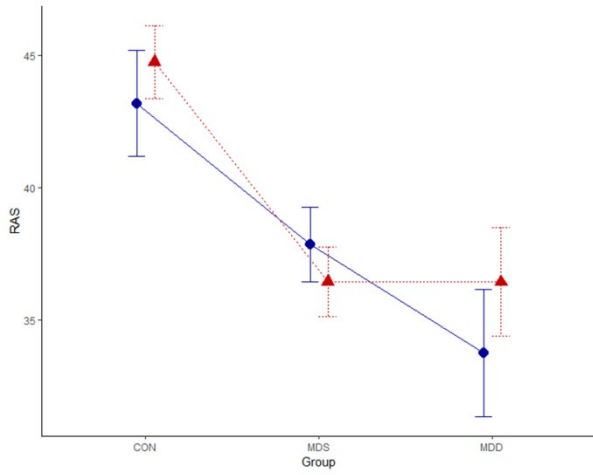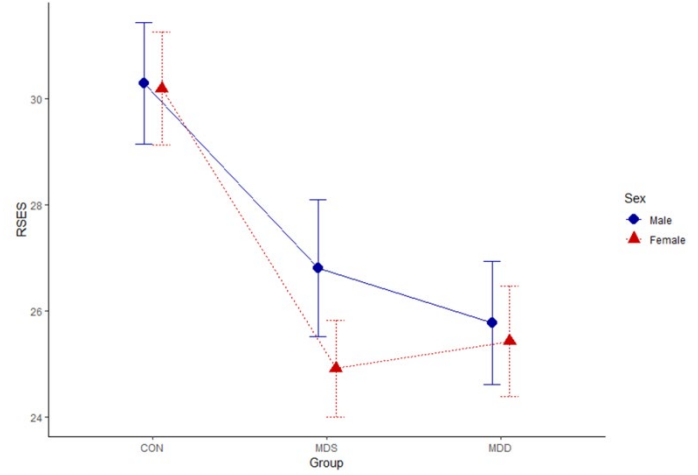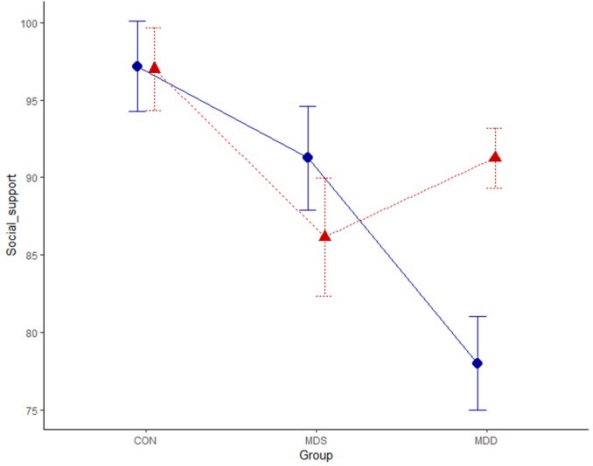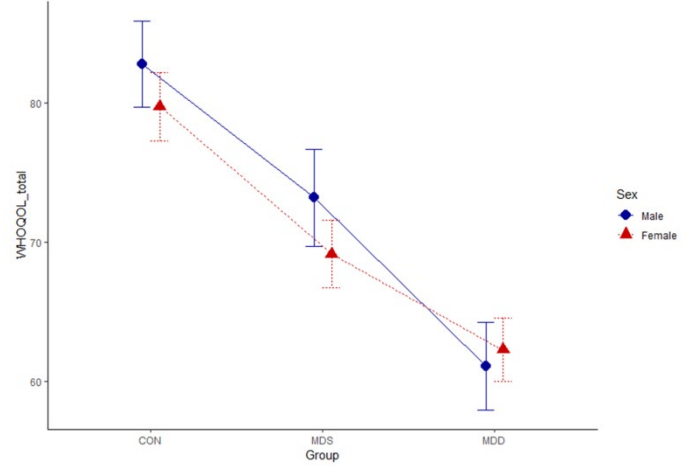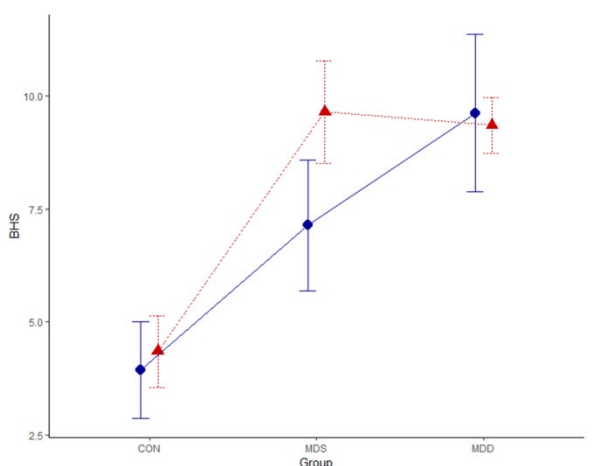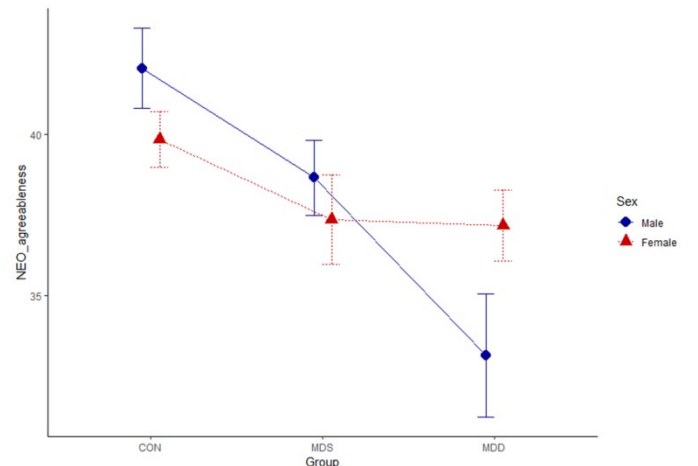

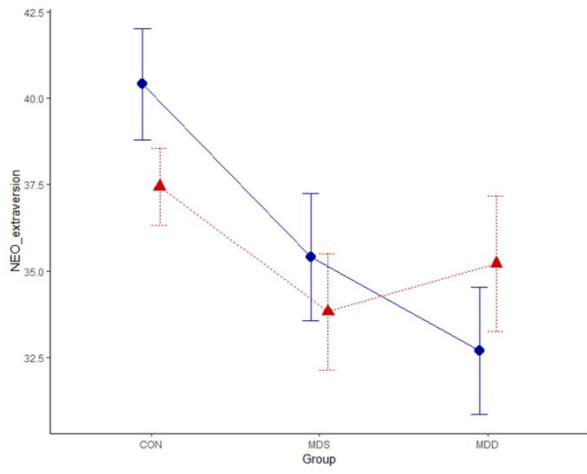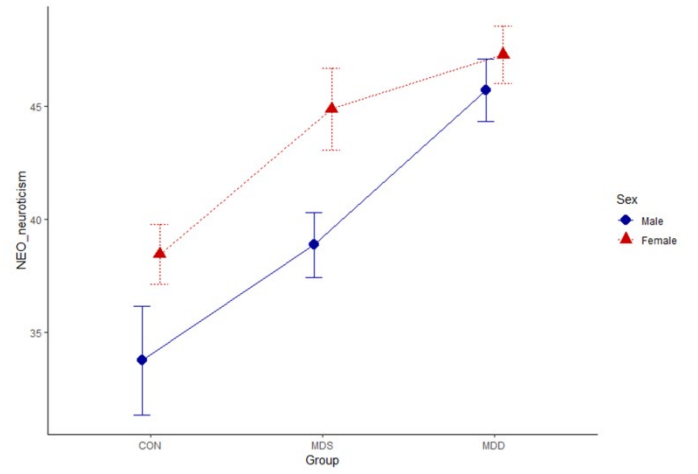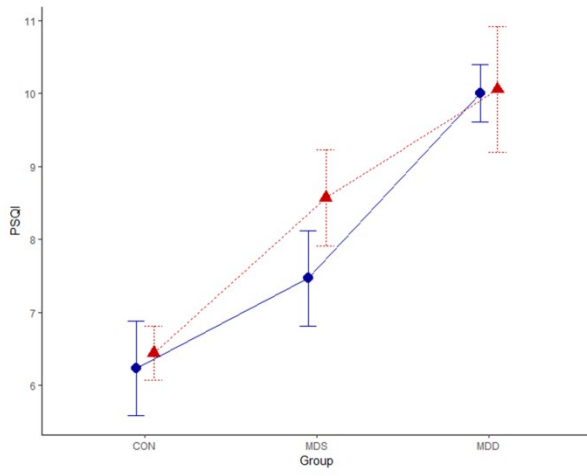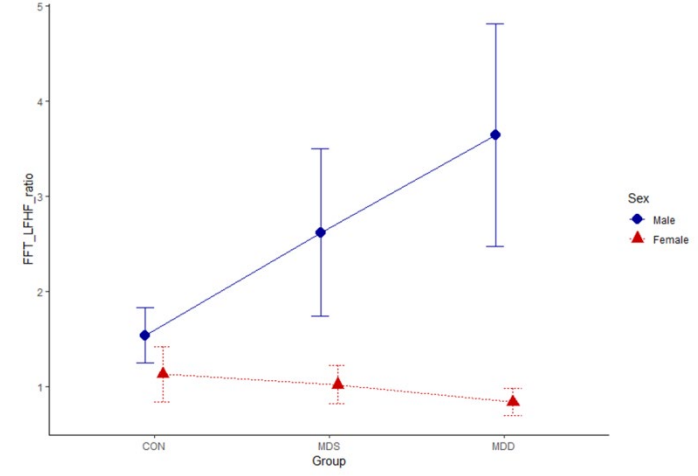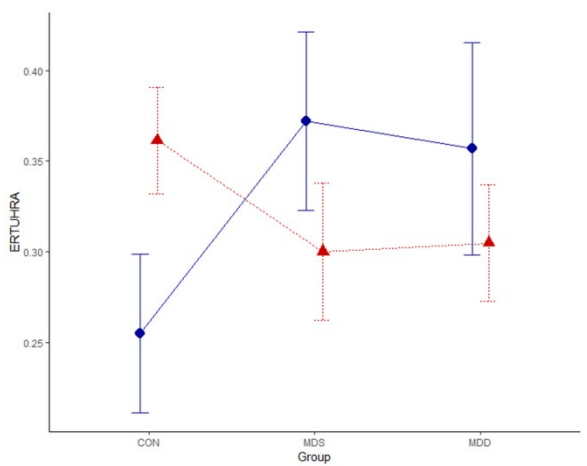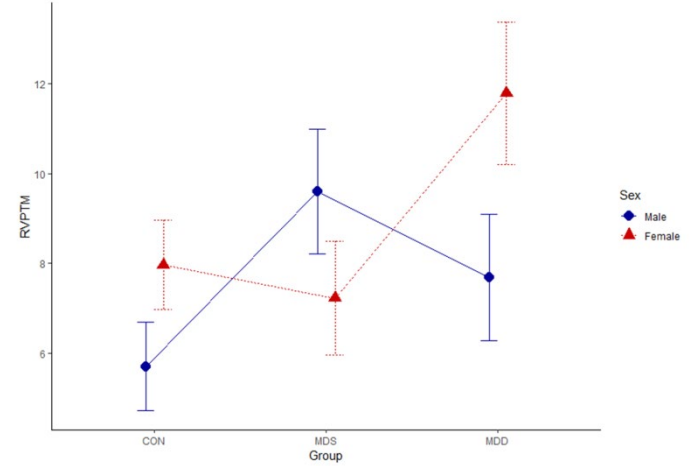

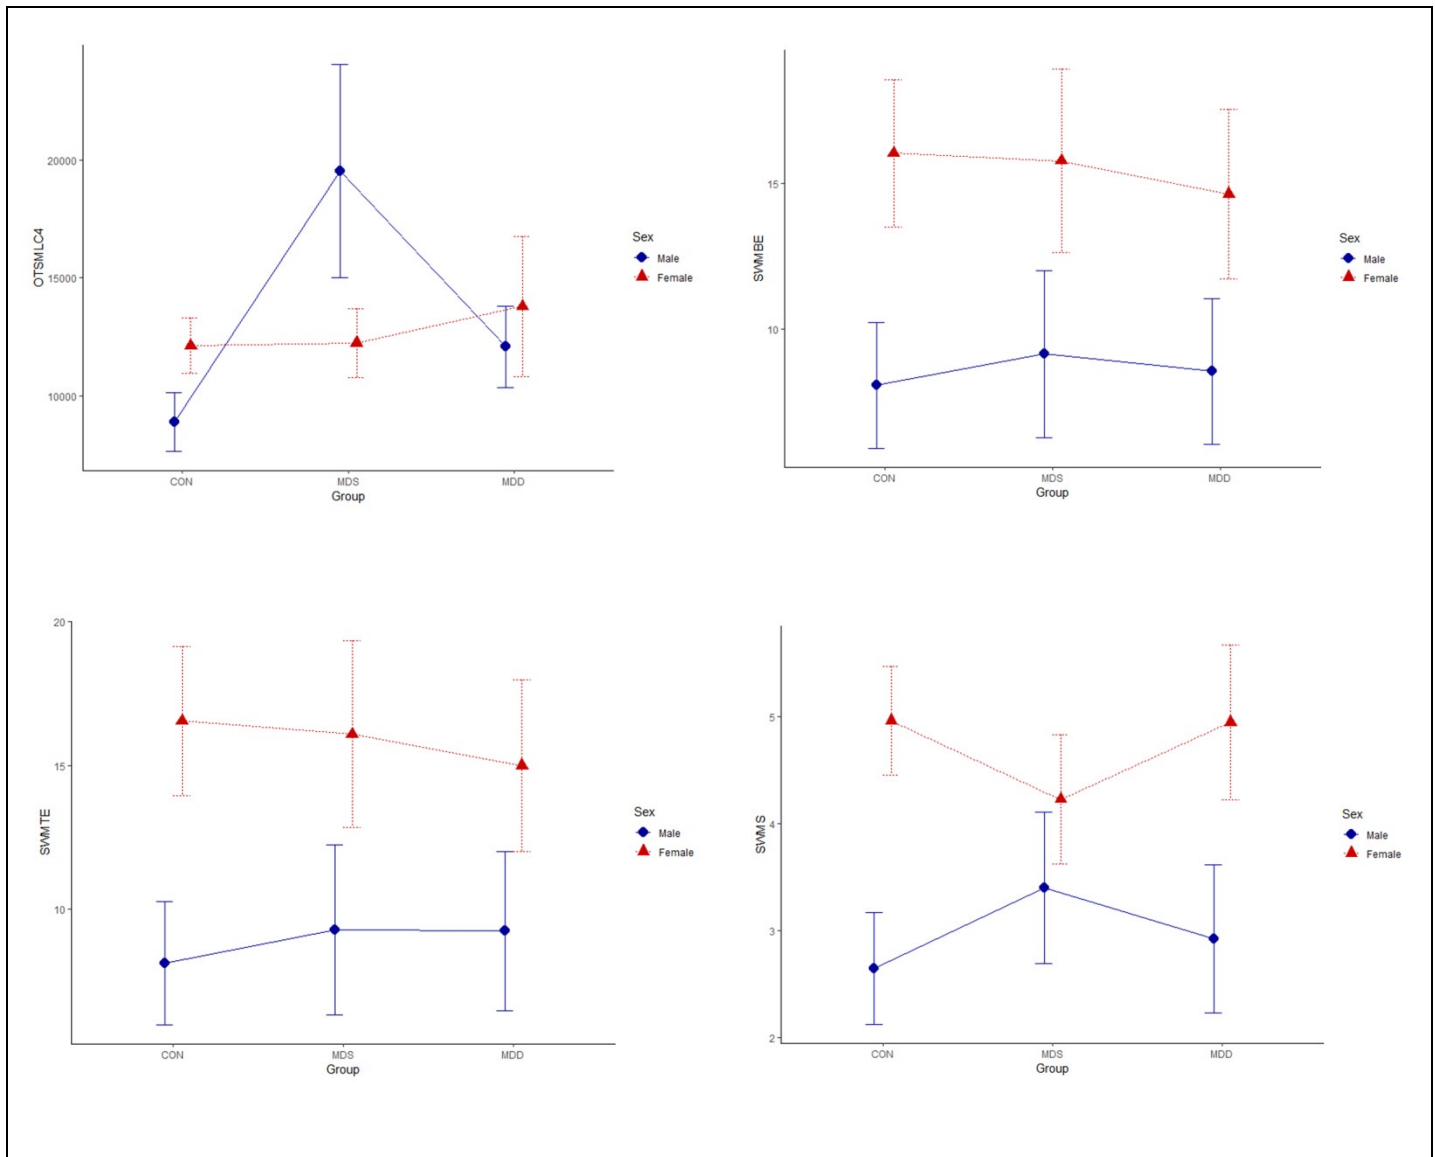

**Supplementary Figure 1.** Significant effects of self-reported clinical scales, HRV, and neurocognitive assessments. Results from Group x Sex interaction plot, where error bars indicate a 95% confidence interval.

HRV = Heart Rate Variability; CON = Control; MDS = Mild Depressive Symptoms; MDD = Major Depressive Disorder; PHQ-9 = Patient Health Questionnaire-9; CES-D = Center for Epidemiologic Studies Depression Scale; STAI-S = State-Trait Anxiety Inventory-State anxiety; GAD-7 = Generalized Anxiety Disorder-7; RAS = Resilience Appraisal Scale; RSES = Rosenberg Self Esteem Scale; WHOQOL = World Health Organization Quality of Life abbreviated version; BHS = Beck Hopelessness Scale; NEO = Neuroticism-Extraversion-Openness; PSQI = Pittsburgh Sleep Quality Index; FFT = Fast Fourier Transform; LF = Low Frequency; HF = High Frequency; ERTUHRA = Emotion Recognition Task Unbiased Hit Rate Anger; RVPTM = Rapid Visual information Processing Total Misses; OTSMLC4 = One Touch Stockings of Cambridge Mean Latency to Correct (4 move); SWMBE = Spatial Working Memory Between Errors; SWMTE = Spatial Working Memory Total Errors; SWMS = Spatial Working Memory Strategy.

\*  $P < .05$ ; \*\*  $P < .01$ ; \*\*\*  $P < .001$ .
